# Supplementary material for: Establishment of a 3D model of tumor-driven angiogenesis to study the effects of anti-angiogenic drugs on pericyte recruitment
Source: Royal Society of Chemistry journal article supplement (doi:10.1039/d0bm02107e), 2021-01-01

Supplementary Figure 1. HCC are hypervascular tumors in which vessels were irregularly covered by pericytes. (A) Representative confocal images of pericyte coverage showing pericyte-covered vessels in three HCC tumors compared to three tumor adjacent normal tissues. Samples were probed by anti-CD31 antibody (red) and anti-NG2 antibody (green). Scale bar 50  $\mu\text{m}$ .

Supplementary Figure 2. CD34<sup>+</sup> PLCs formed more aggressive microtumors compared to CD34<sup>-</sup> PLCs. (A) Representative confocal images and (B) protein expression of CA9 in CD34<sup>+</sup> microtumors compared to CD34<sup>-</sup> microtumors, quantified by MFI per microtumor. Samples were probed by anti-CA9 (red) antibody and counterstained by DAPI (blue). Scale bar 50  $\mu\text{m}$ . \*\*\*\* $p < 0.0001$ .

Supplementary Figure 3. Microcarriers as supporting matrices enhanced tumor cell-ECM interactions and promoted malignancy of tumor cells. (A) Bright-field microscopy images of spheroids and microtumors embedded in Matrigel on Day 3. Scale bar 50  $\mu\text{m}$ . (B) Quantification of the migration area of spheroids and microtumors. \*\*\*\* $p < 0.0001$ .

Supplementary Figure 4. ZA counteracted Sora-elicited vascular immature through enhancing the expression and activation of ErbB1/ErbB2 and PDGFR- $\beta$  receptors of pericytes. (A) Representative confocal images of vascular pericyte coverage and (B) the quantification of NG2 and CD31 co-staining in microtumors. Microtumors were pretreated with 50 nM ZA, 10 nM SU 16f, 10nM canertinib, 10 nM SU 16f plus 10nM canertinib for 8 hours prior to exposure to ZA for 48 hours. Samples were probed by anti-CD31 (red) and anti-NG2 (green) antibodies. Scale bar 50  $\mu\text{m}$ . \*\*\*\* $p < 0.0001$ .

Supplementary Figure 5. ZA enhanced pericyte coverage of vessels in HCC mouse model via upregulating the expression and activation of ErbB1/ErbB2 and PDGFR- $\beta$  receptors in pericytes. (A) Representative confocal images of ErbB2 expression in pericytes (B) the quantification of ErbB2 expression in pericytes of tumors treated with Sora, ZA, Sora plus ZA. Samples were probed by anti-ErbB2 (red) and anti-NG2 (green) antibodies. Scale bar 50  $\mu\text{m}$ . (C) Representative confocal images of PDGFR- $\beta$  expression in pericytes (D) the quantification of PDGFR- $\beta$

expression in pericytes of tumors treated with Sora, ZA, Sora plus ZA. Samples were probed by anti-PDGFR- $\beta$  (red) and anti-NG2 (green) antibodies. Scale bar 50  $\mu\text{m}$ . \*\*\*\* $p < 0.0001$ .

Supplementary Figure 6. ZA enhanced pericyte coverage of vessels in HCC mouse model via upregulating the expression and activation of ErbB1/ErbB2 and PDGFR- $\beta$  receptors in pericytes. (A) Representative confocal images of phospho-ErbB1 expression in pericytes (B) the quantification of phospho-ErbB1 expression in pericytes of tumors treated with Sora, ZA, Sora plus ZA. Samples were probed by anti-phospho-ErbB1 (red) and anti-NG2 (green) antibodies. Scale bar 50  $\mu\text{m}$ . (C) Representative confocal images of phospho-ErbB2 expression in pericytes (D) the quantification of phospho-ErbB2 expression in pericytes of tumors treated with Sora, ZA, Sora plus ZA. Samples were probed by anti-phospho-ErbB2 (red) and anti-NG2 (green) antibodies. Scale bar 50  $\mu\text{m}$ . \*\*\*\* $p < 0.0001$ .

Supplementary Figure 7. ZA enhanced pericyte coverage of vessels in HCC mouse model via upregulating the expression and activation of ErbB1/ErbB2 and PDGFR- $\beta$  receptors in pericytes. (A) Representative confocal images of phospho-PDGFR- $\beta$  expression in pericytes (B) the quantification of phospho-PDGFR- $\beta$  expression in pericytes of tumors treated with Sora, ZA, Sora plus ZA. Samples were probed by anti-phospho-PDGFR- $\beta$  (red) and anti-NG2 (green) antibodies. Scale bar 50  $\mu\text{m}$ . \*\*\*\* $p < 0.0001$ .

Supplementary Figure 8. (A) Establishment of 3D model of tumor-driven angiogenesis. (a) The mixture of HUVECs and pericytes was co-cultured with microcarriers. (b) HUVECs and pericytes formed pericyte-covered endothelial tubes on microcarriers. (c) Addition of CD34<sup>+</sup> PLCs and MSCs to microcarriers carrying pericyte-covered vessels to form multicellular aggregates. (d) The formation of vascularized tumor microtissue. (B) Schematic diagram of ZA enhanced pericyte recruitment to vessels. (C) Schematic diagram of the proposed mechanisms by which ZA promoted pericyte recruitment to vessels.

Figure S1

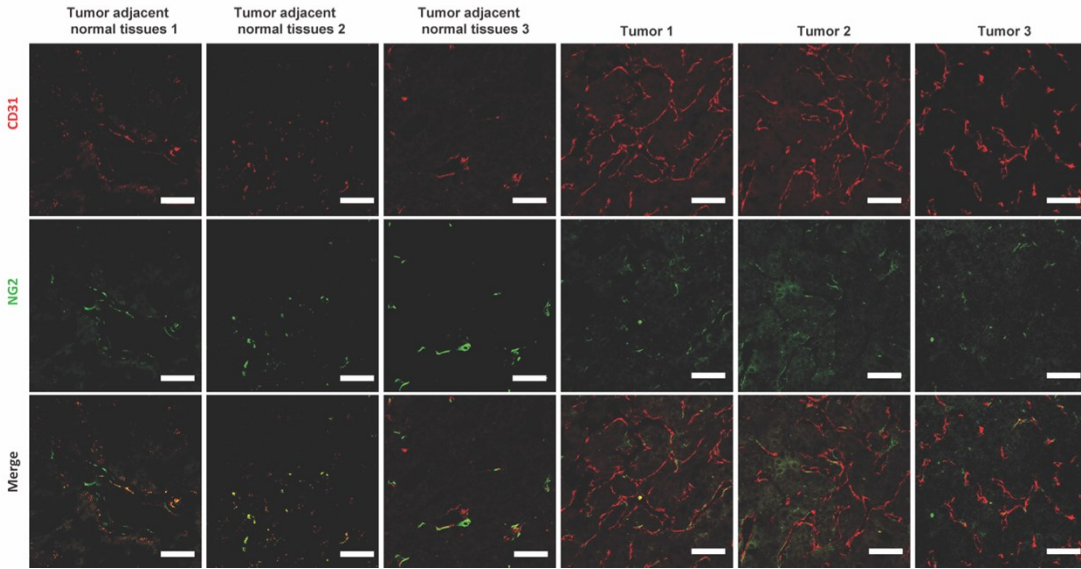

Figure S2

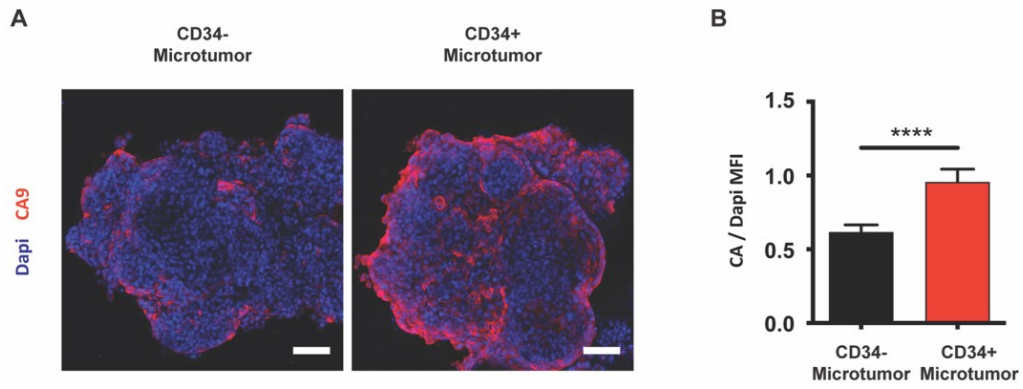

Figure S3

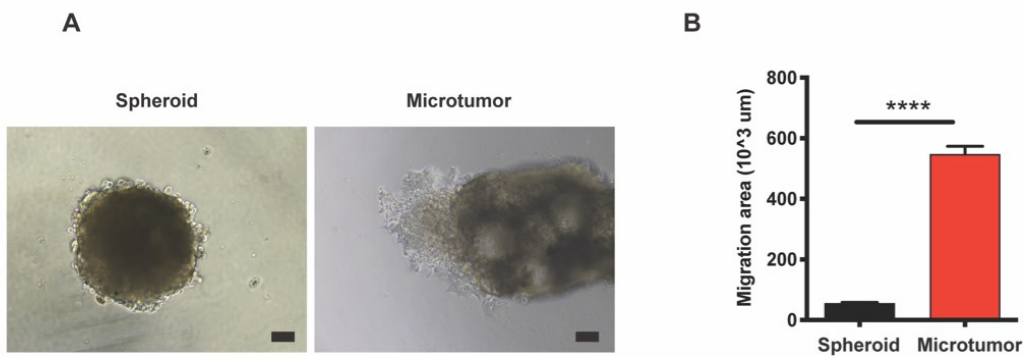

Figure S4

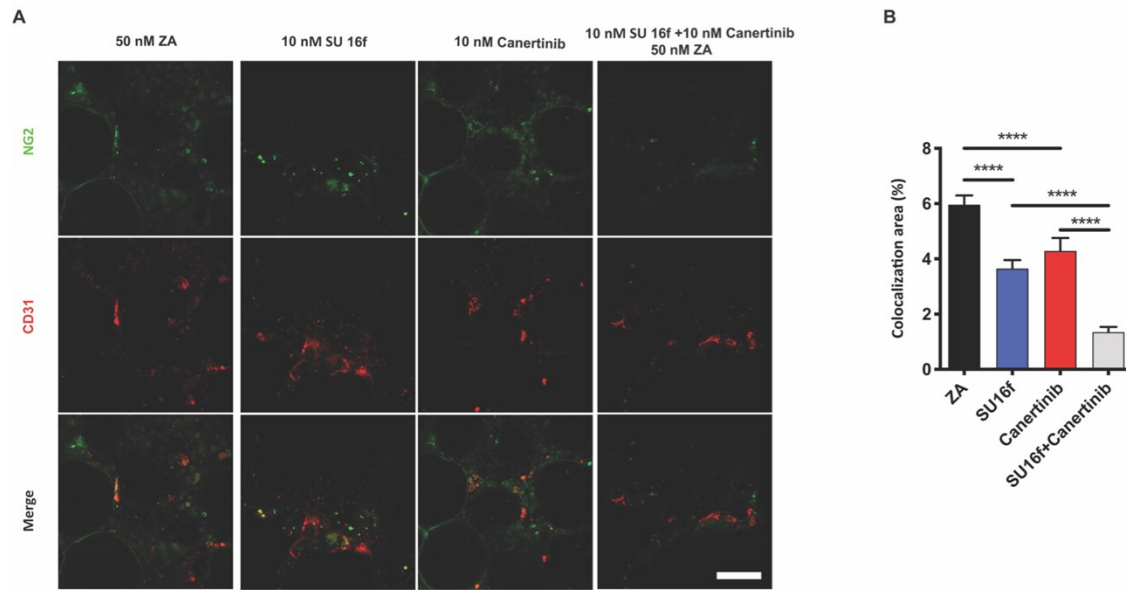

Figure S5

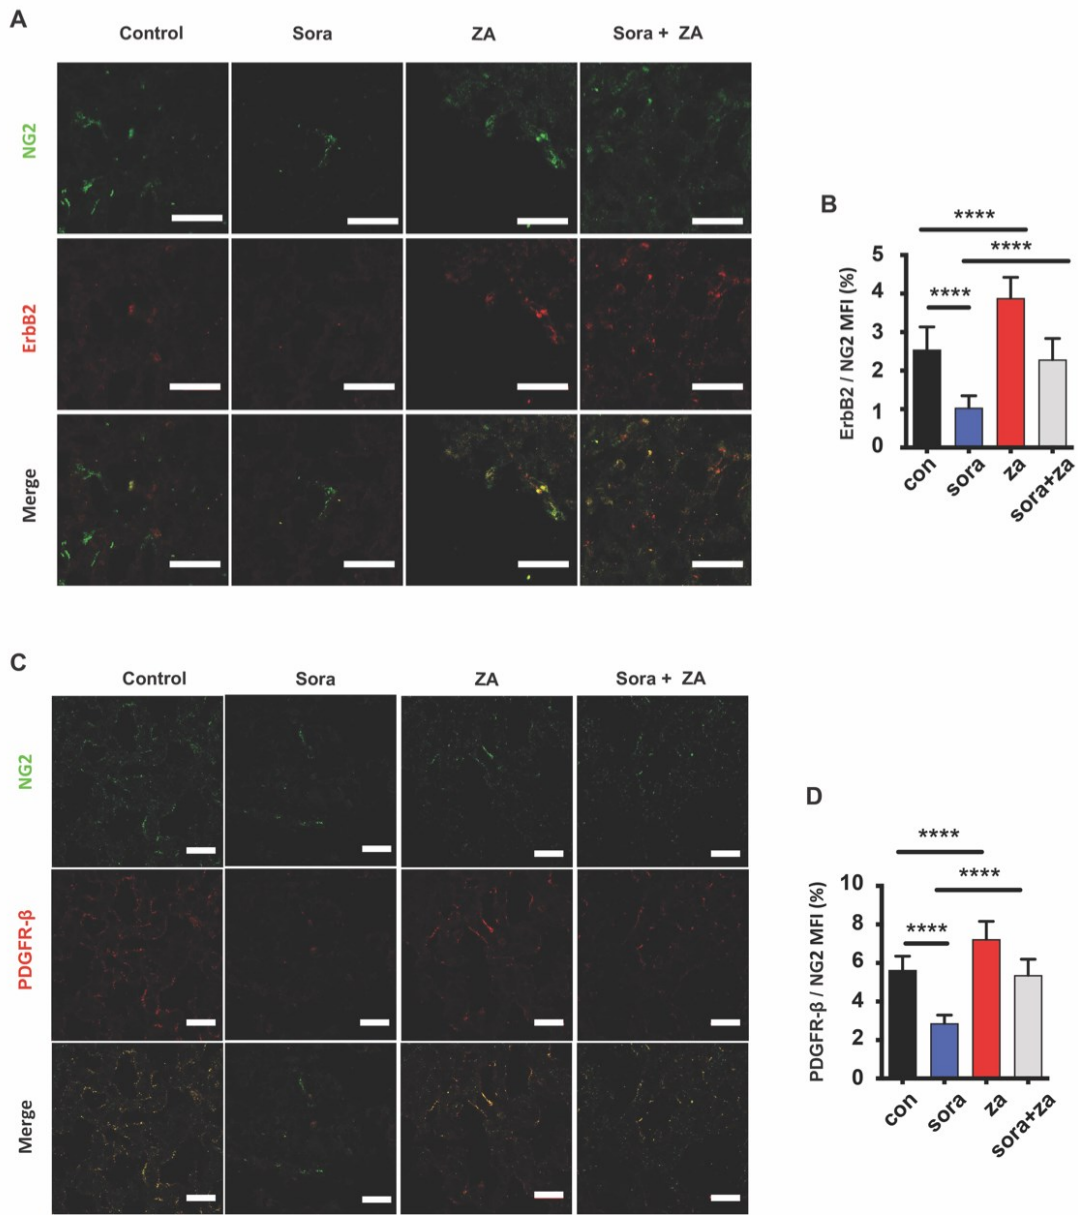

Figure S6

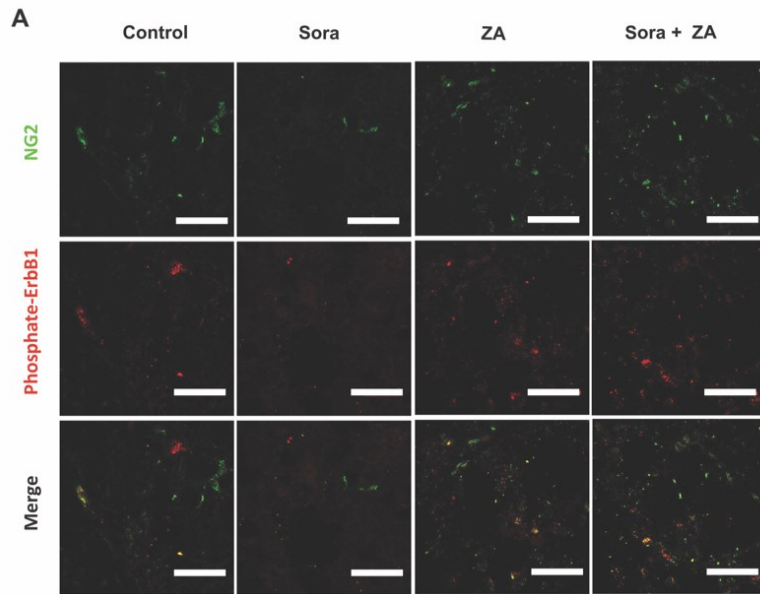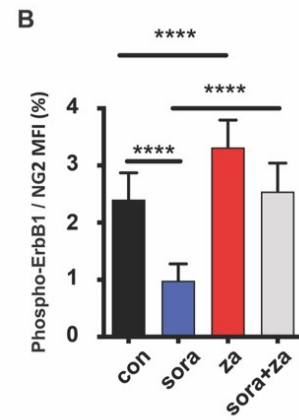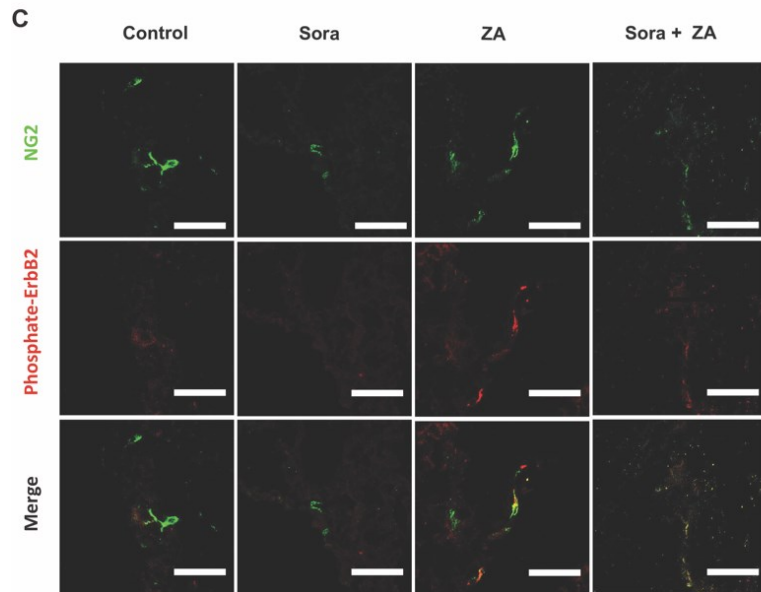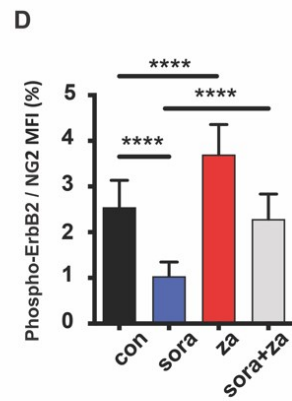

Figure S7

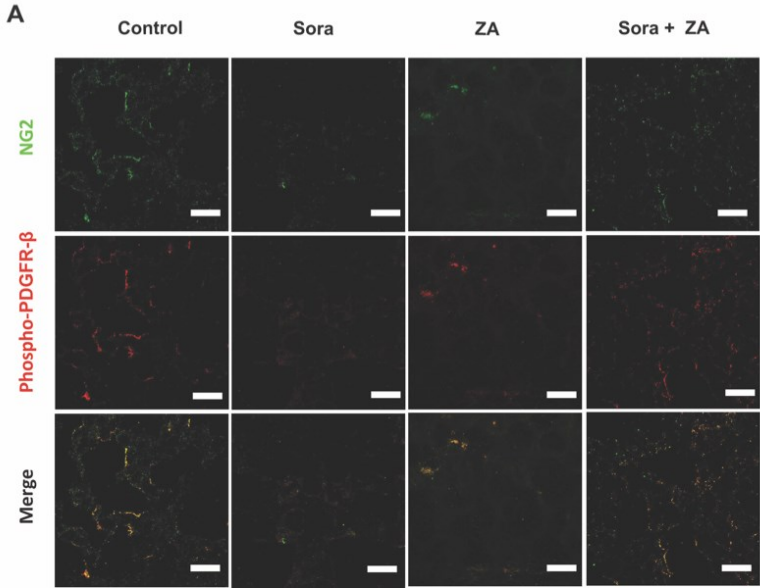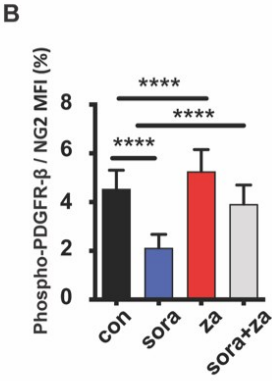

Figure S8

A

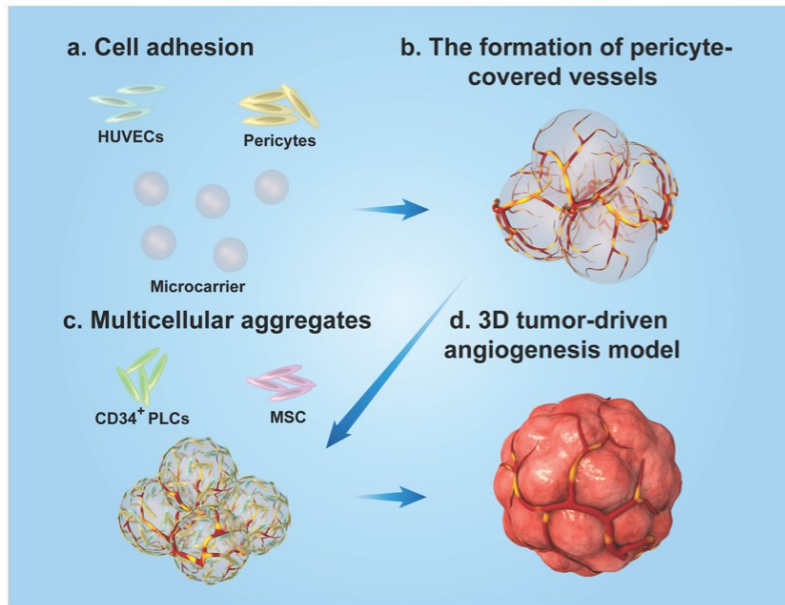

B

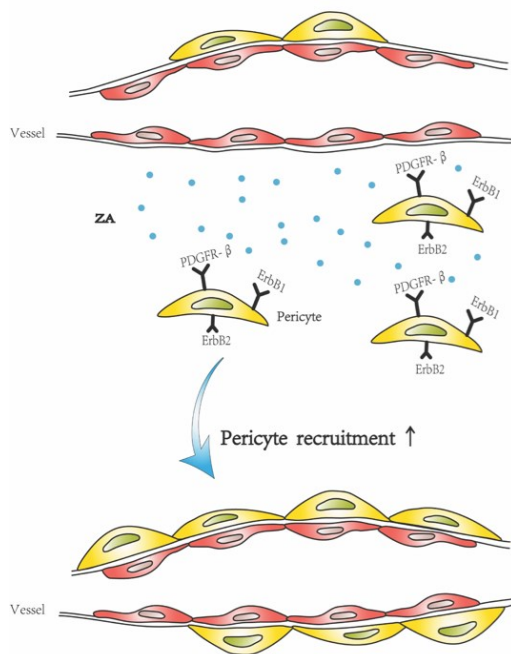

C

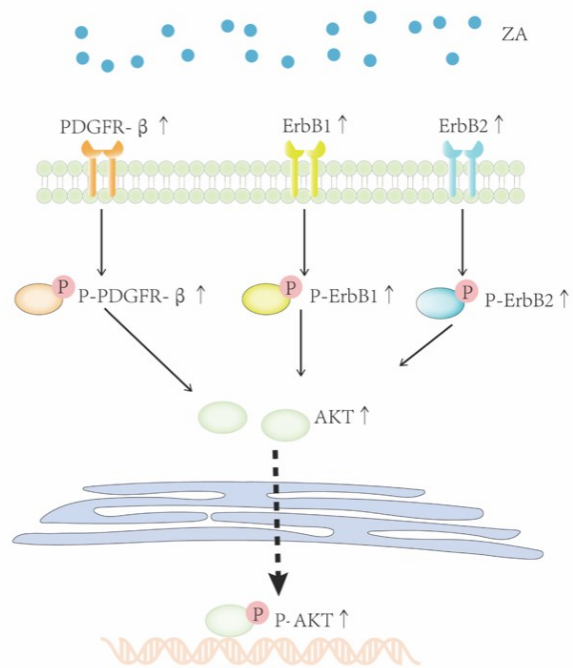

Supplement: d0bm02107e1.pdf [file d0bm02107e1.pdf]
