# Supplementary material for: Establishment of a 3D model of tumor-driven angiogenesis to study the effects of anti-angiogenic drugs on pericyte recruitment
Source: Royal Society of Chemistry journal article supplement (doi:10.1039/d0bm02107e), 2021-01-01
Supplement: d0bm02107e2.xlsx [file d0bm02107e2.xlsx]

## Sheet: Sheet1
Antibody Name	Company	Category
Anti-human CD31	ReliaTech GmbH	102-PA07S
Alexa Fluor 488 mouse anti-chondroitin sulfate	BD Pharmingen	562413
anti-hSerum Albumin	R&D systems	MAB1455
Ki-67 (8D5) Mouse mAb	Cell Signaling Technology	9449S
Cleaved Caspase-3 (Asp175) (5A1E) Rabbit mAb	Cell Signaling Technology	9664S
VEGF Receptor 2 (D5B1) Rabbit mAb	Cell Signaling Technology	9698S
Anti-67kDa Laminin Receptor (67LR) antibody [EPR8469]	abcam	ab133645
anti-Collagen IV antibody [1043]	abcam	ab86042
PE anti-human CD140b (PDGFR-β)	BioLegend	323606
PE anti-human CD34	BioLegend	343606
Carbonic Anhydrase IX (CA9) goat antibody	R&D systems	AF2188
anti-Mouse NG2/MSCP rat antibody	R&D systems	MAB6689-SP
anti-Mouse EGFR goat antibody	R&D systems	AF 1280-SP
anti-Mouse PDGFR-β goat antibody	R&D systems	AF1042-SP
anti-ErbB2 antibody[EP1045Y]	abcam	ab134182
anti-phospho EGFR (Tyr1068) (D7A5)	Cell Signaling Technology	3777T
anti-phospho ErbB2 (Tyr1221/1222) (6B12)	Cell Signaling Technology	2243T
anti-phospho PDGFR-β (Tyr751) (C63G6)	Cell Signaling Technology	4549T
Anti-rabbit IgG (H+L) F(ab')2 Fragment (Alexa Fluor 594 Conjugate)	Cell Signaling Technology	8889S
Anti-rabbit IgG (H+L)F(ab')2 Fragment (Alexa Fluor 488 Conjugate)	Cell Signaling Technology	4412S
Anti-mouse IgG (H+L) F(ab')2 Fragment (Alexa Fluor 594 Conjugate)	Cell Signaling Technology	8890S
Anti-mouse IgG (H+L)F(ab')2 Fragment (Alexa Fluor 488 Conjugate)	Cell Signaling Technology	4408S
Anti-rat lgG (H+L) (Alexa Fluor 488 Conjugate)	Cell Signaling Technology	4416
Anti-goat lgG H&L (Alexa Fluor 594 Conjugate)	abcam	ab150136
PE Mouse IgG1, κ Isotype Control	BD Pharmingen	556650
