# Supplementary material for: Establishment of a 3D model of tumor-driven angiogenesis to study the effects of anti-angiogenic drugs on pericyte recruitment
Source: Royal Society of Chemistry journal article supplement (doi:10.1039/d0bm02107e), 2021-01-01
Supplement: d0bm02107e3.pdf [file d0bm02107e3.pdf]

| Gene Name        |                         |
|------------------|-------------------------|
| ALB F            | GAGACCAGAGGTTGATGTGATG  |
| ALB R            | AGTTCCGGGGCATAAAAGTAAG  |
| Ki67 F           | ACGCCTGGTTACTATCAAAAGG  |
| Ki67 R           | CAGACCCATTTACTTGTGTTGGA |
| Caspase 3 F      | GAAATTGTGGAATTGATGCGTGA |
| Caspase 3 R      | CTACAACGATCCCCTCTGAAAA  |
| CD31 F           | AACAGTGTTGACATGAAGAGCC  |
| CD31 R           | TGTAAAACAGCACGTCATCCTT  |
| VEGFR2 F         | GTGATCGGAAATGACACTGGAG  |
| VEGFR2 R         | CATGTTGGTCACTAACAGAAGCA |
| 67LR F           | CCATTTCCCGTGAACACCCAT   |
| 67LR R           | GTAGCAGTGAACCTCAGGAGCG  |
| ErbB1 F          | CCCCTCATGCTCTACAACCC    |
| ErbB1 R          | TCGCACTTCTTACACTTGCGG   |
| ErbB2 F          | TGCAGGGAAACCTGGAACCTC   |
| ErbB2 R          | ACAGGGGTGGTATTGTTTCAGC  |
| PDGFR- $\beta$ F | AGCACCTTCGTTCTGACCTG    |
| PDGFR- $\beta$ R | TATTCTCCCGTGTCTAGCCCA   |
| AKT F            | AGCGACGTGGCTATTGTGAAG   |
| AKT R            | GCCATCATTCTTGAGGAGGAAGT |
| GAPDH F          | GAAGATGGTGATGGGATTTTC   |
| GAPDH R          | GAAGGTGAAGGTCGGAGTC     |
